# Supplementary material for: The Prognostic Significance of Vasohibin-1 Expression in Patients with Upper Urinary Tract Urothelial Carcinoma
Source: Oxford University Press journal article supplement (doi:10.1158/1078-0432.ccr-12-0073), 2012-06-06
Supplement: 10780432ccr120073-sup-t3_31k.xls [file 10780432ccr120073-sup-t3_31k.xls]

## Sheet: Table 3
Supplementary Table 3.
Univariate and multivariate analysis for recurrence-free survival and cancer-specific survival in 171 UTUC patients
Characteristic	Recurrence-free survival			Cancer-specific survival
	Univariate	Multivariate		Univariate	Multivariate
	P value	HR (95%CI)	P value	P value	HR (95%CI)	P value
Age:	0.75			0.467
<70 years
>70 years
Gender:	0.516			0.339
Male
Female
Tumor Location:	0.554			0.297
Renal pelvis
Ureter
Tumor grade:	<0.001		0.024	<0.001		0.029
Low
High		4.08 (1.20-13.8)			5.21 (1.19-22.9)
Pathological T stage:	<0.001			<0.001
<pT2
>pT2
Lymphvascular invasion:	<0.001		<0.001	<0.001		<0.001
Positive		4.80 (2.34-9.83)			5.11 (2.23-11.7)
Negative
Adjuvant Chemotherapy:	<0.001			0.001
Yes
No
MVD	0.054			0.198
< 80/mm2
> 80/mm2
VASH1 density	0.005		0.022	0.027		0.047
< 50/mm2
> 50/mm2		2.08 (1.11-3.89)			2.06 (1.01-4.18)
Supplementary Table 3. Univariate and multivariate analysis for recurrence-free survival and cancer-specific survival in 171 UTUC patients: We used the cutoff value of MVD > 80/mm2 and VASH1 density > 50/mm2 according to the mean values. The levels of VASH1 density were independent predictors for a decrease in recurrence-free (HR = 2.08) and cancer-specific survival (HR = 2.06).
